# Supplementary material for: Bioinspired spike-like double yolk–shell structured TiO2@ZnIn2S4 for efficient photocatalytic CO2 reduction
Source: Royal Society of Chemistry journal article supplement (doi:10.1039/d1cy02079j), 2021-12-28
Supplement: d1cy02079j1.pdf [file d1cy02079j1.pdf]

## Supporting Information

### Bioinspired spiky-like double yolk-shell structured $\text{TiO}_2@\text{ZnIn}_2\text{S}_4$ for efficient photocatalytic $\text{CO}_2$ reduction

Ping She<sup>a,b</sup>, Buyuan Guan<sup>a,b</sup>, Jiayao Sheng<sup>a,b</sup>, Yuanyuan Qi<sup>a</sup>, Guanyu Qiao<sup>a</sup>, Hongbang Rui<sup>a</sup>, Geyu Lu<sup>c</sup>, Jun-sheng Qin<sup>\*a,b</sup>, Heng Rao<sup>\*a,b</sup>

\*Corresponding author email: [qin@jlu.edu.cn](mailto:qin@jlu.edu.cn), [rao@jlu.edu.cn](mailto:rao@jlu.edu.cn).

<sup>a</sup> State Key Laboratory of Inorganic Synthesis and Preparative Chemistry, College of Chemistry, Jilin University, 2699 Qianjin Street, Changchun 130012, P. R. China.

<sup>b</sup> International Center of Future Science, Jilin University, 2699 Qianjin Street, Changchun 130012, P. R. China.

<sup>c</sup> State Key Laboratory on Integrated Optoelectronics, Key Laboratory of Gas Sensors, Jilin Province, College of Electronic Science and Engineering, Jilin University, 2699 Qianjin Street, Changchun 130012, P. R. China.

Keywords: bioinspired; double yolk-shell; photocatalytic  $\text{CO}_2$  reduction; titanium dioxide;  $\text{ZnIn}_2\text{S}_4$

The flat band potential of semiconductor film in a liquid junction can be estimated from the Mott–Schottky equation 1:

$$\frac{1}{C_{SC}^2} = (2/e\epsilon\epsilon_0 N_D)(E - E_{fb} - kT/e)$$

equation 1

where  $C_{SC}$  is the space charge capacitance in  $\text{F cm}^{-2}$ ;  $e$  is the electronic charge in  $\text{C}$ ;  $\epsilon$  is the dielectric constant of the semiconductor;  $\epsilon_0$  is the permittivity of free space;  $N_D$  is the carrier density in  $\text{cm}^{-3}$ ;  $E$  is the applied potential in  $\text{V}$ ;  $E_{fb}$  is the flat band potential in  $\text{V}$ ;  $k$  is the Boltzmann constant; and  $T$  represents the temperature in  $\text{K}$ . The temperature related term ( $kT/e$ ) in eq 1 is negligible, 0.0257, at room temperature. The flat band potential is obtained from the x-intercept of the tangent line of the Mott–Schottky curve on potential axis (vs.  $\text{Ag/AgCl}$ ). According to the equation that  $E(\text{NHE}) = E(\text{Ag/AgCl}) + 0.197 \text{ V}$ , the flat band potentials (VS. NHE) of the obtained materials were calculated to be  $E(\text{Ag/AgCl})$  plus 0.197 V. In this way, the flat band potential of the prepared materials was determined.

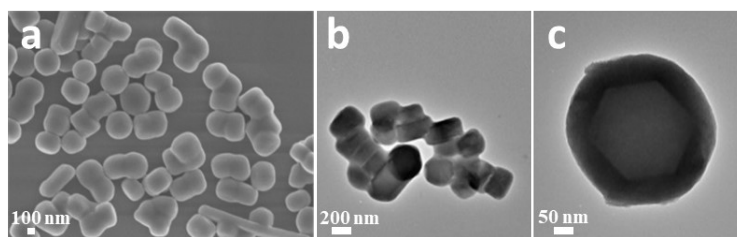

**Figure S1.** SEM (a) and TEM images (b, c) of S1@TiO<sub>2</sub>

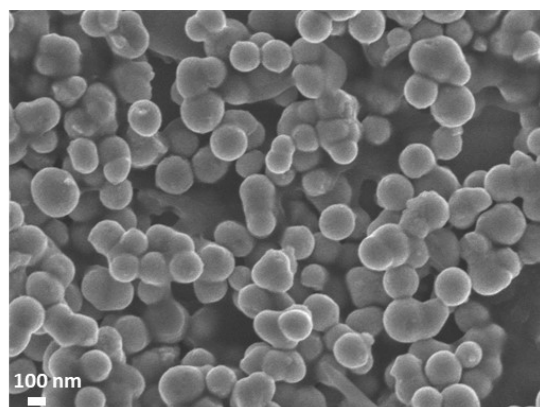

**Figure S2.** SEM of TiO<sub>2</sub> NPs

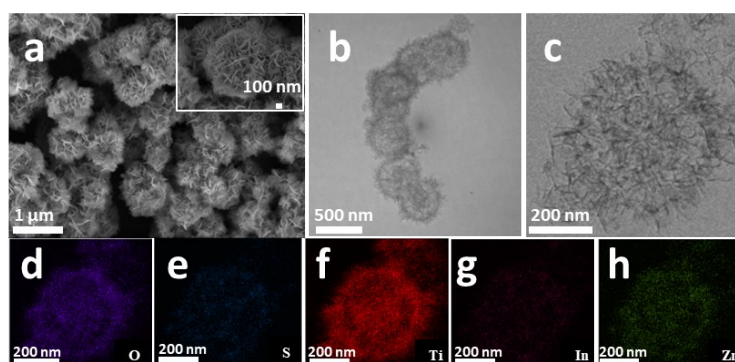

**Figure S3.** SEM (a), TEM (b, c) and EDS mapping images (d-h) of D-Y-TiO<sub>2</sub>@ZnIn<sub>2</sub>S<sub>4</sub>-1

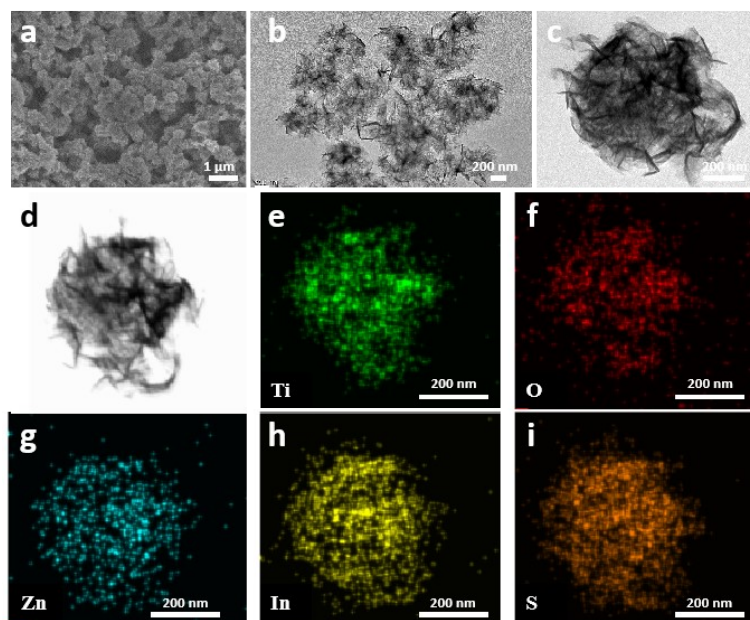

**Figure S4.** SEM (a), TEM (b, c) and EDS mapping images (d-i) of D-Y-TiO<sub>2</sub>@ZnIn<sub>2</sub>S<sub>4</sub>-2

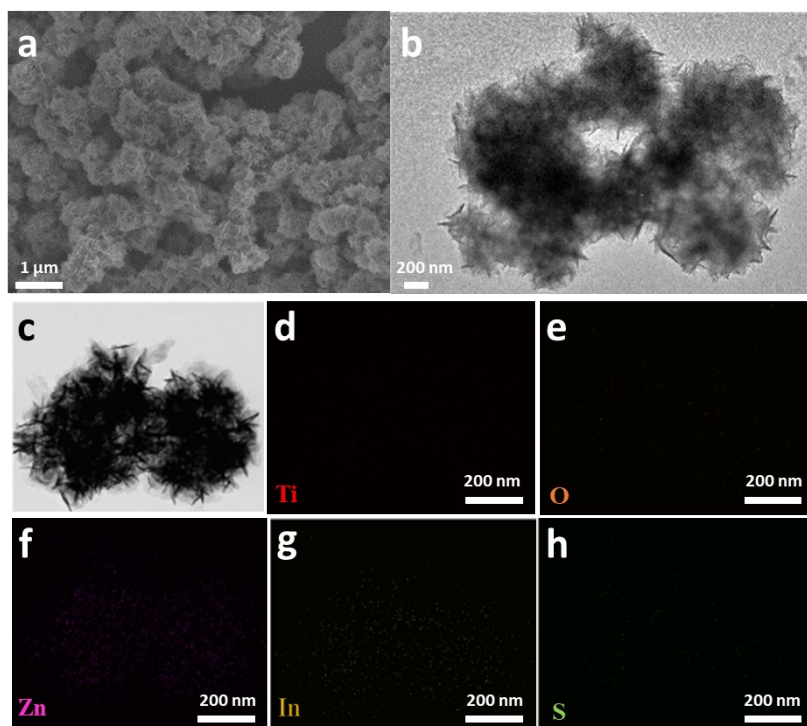

**Figure S5.** SEM (a), TEM (b, c) and EDS mapping images (d-h) of D-Y-TiO<sub>2</sub>@ZnIn<sub>2</sub>S<sub>4</sub>-4

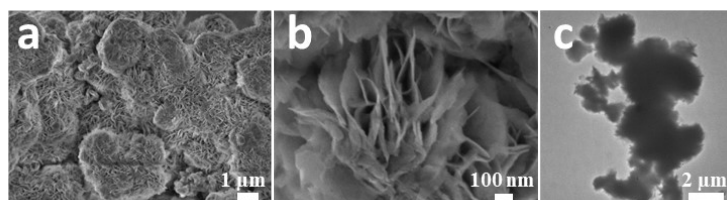

**Figure S6.** SEM (a, b) and TEM images (c) of ZnIn<sub>2</sub>S<sub>4</sub> only

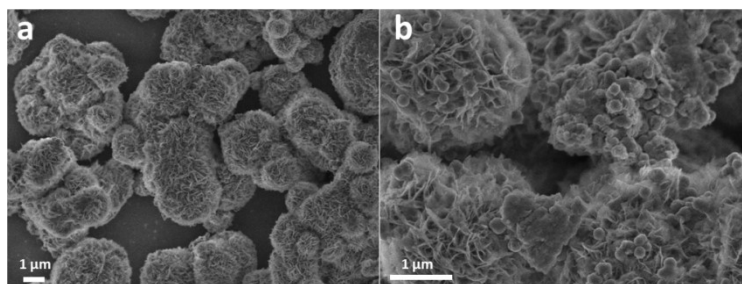

**Figure S7.** SEM images of TiO<sub>2</sub> NPs@ZnIn<sub>2</sub>S<sub>4</sub>-3, (b) is the enlarged image of (a).

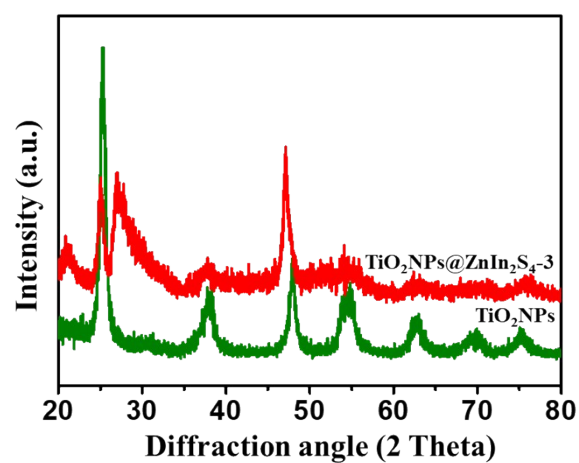

**Figure S8.** XRD of TiO<sub>2</sub> NPs and TiO<sub>2</sub> NPs@ZnIn<sub>2</sub>S<sub>4</sub>-3.

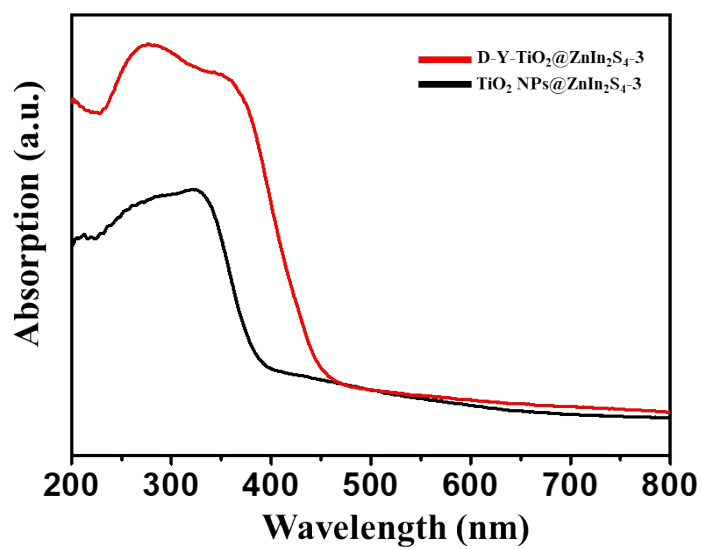

**Figure S9.** UV-Vis spectra of D-Y-TiO<sub>2</sub>@ZnIn<sub>2</sub>S<sub>4</sub>-3 and TiO<sub>2</sub> NPs@ZnIn<sub>2</sub>S<sub>4</sub>-3.

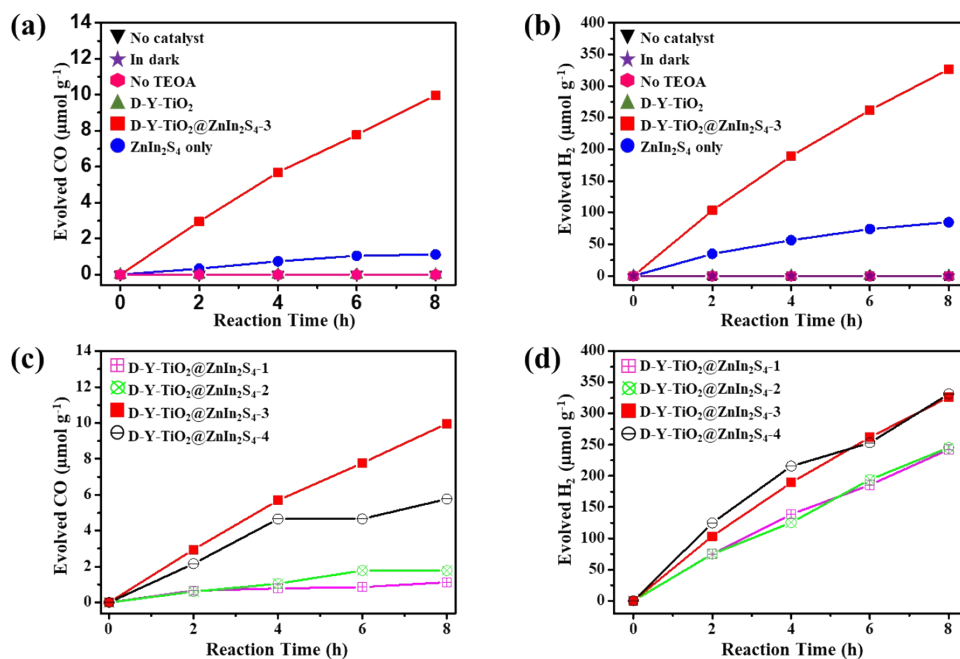

**Figure S10.** PCR of different samples under LED irradiation ( $\lambda=420$  nm). Amounts of CO (a, c) and H<sub>2</sub> (b, d) generation of D-Y-TiO<sub>2</sub>, ZnIn<sub>2</sub>S<sub>4</sub> only, and D-Y-TiO<sub>2</sub>@ZnIn<sub>2</sub>S<sub>4</sub> with different loading amount of ZnIn<sub>2</sub>S<sub>4</sub>.

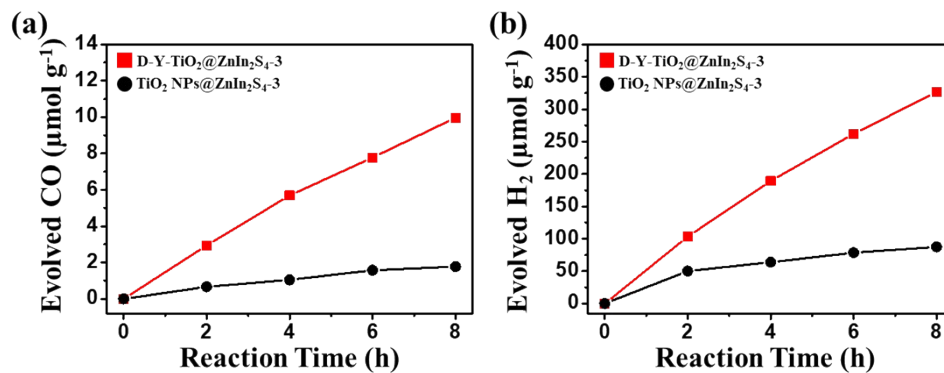

**Figure S11.** CO<sub>2</sub> photocatalytic reduction of D-Y-TiO<sub>2</sub>@ZnIn<sub>2</sub>S<sub>4</sub>-3 and TiO<sub>2</sub> NPs@ZnIn<sub>2</sub>S<sub>4</sub>-3 under LED irradiation ( $\lambda=420$  nm). (a) Amounts of CO generation; (b) Amounts of H<sub>2</sub> generation.

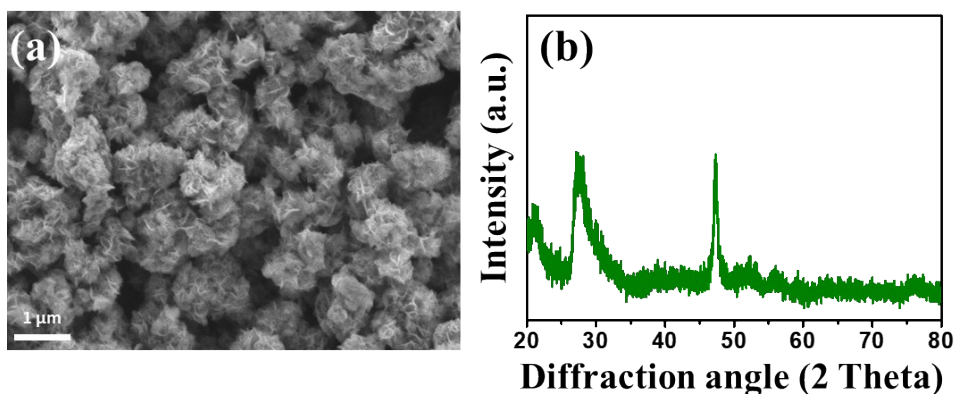

**Figure S12.** SEM (a) and XRD (b) of D-Y-TiO<sub>2</sub>@ZnIn<sub>2</sub>S<sub>4</sub>-3 after the photocatalytic reaction.

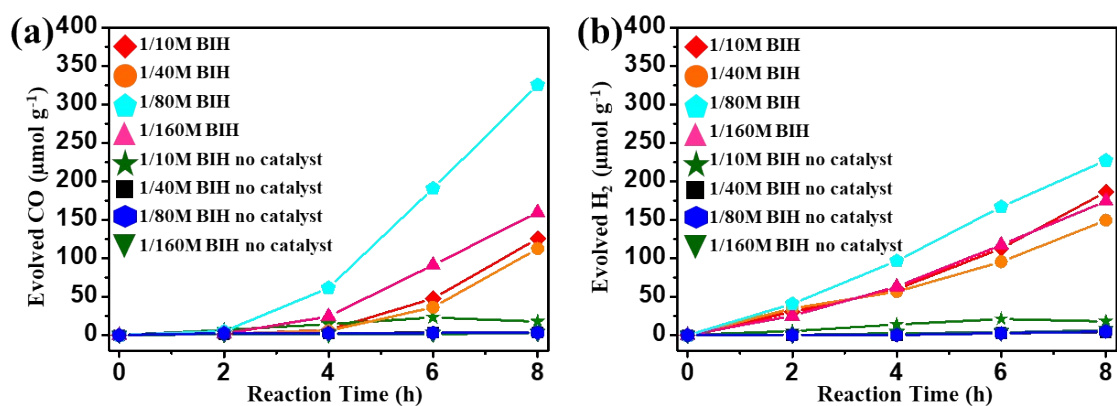

**Figure S13.** Time courses of CO (a) and H<sub>2</sub> (b) generation of D-Y-TiO<sub>2</sub>@ZnIn<sub>2</sub>S<sub>4</sub> with various sacrificial reagents.

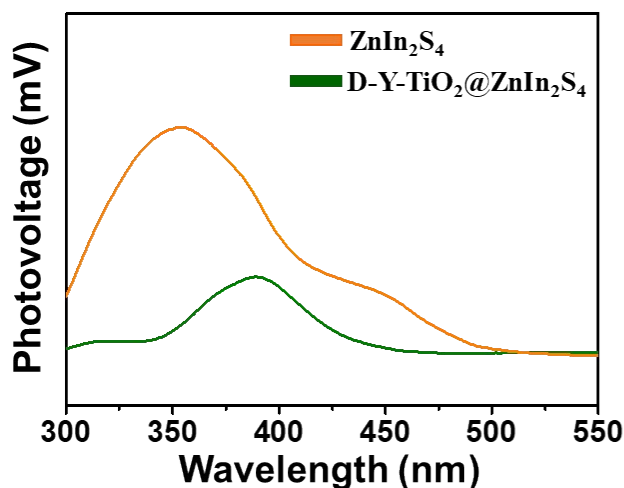

**Figure S14.** The surface photovoltage of ZnIn<sub>2</sub>S<sub>4</sub> and D-Y-TiO<sub>2</sub>@ZnIn<sub>2</sub>S<sub>4</sub>.



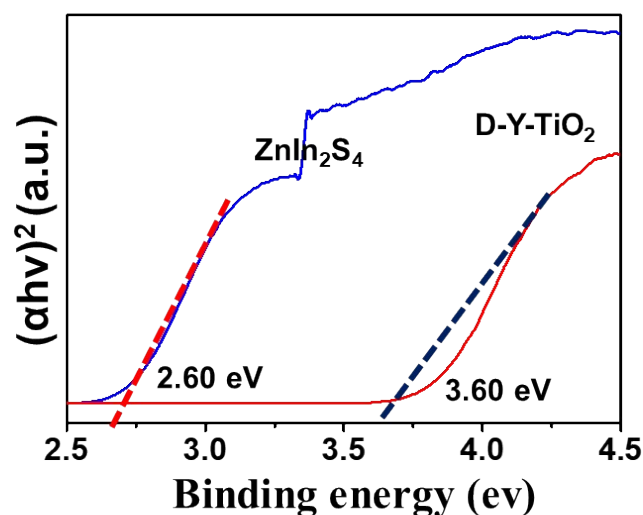

**Figure S15.** Tauc plots of  $(\alpha h\nu)^2$  vs photon energy of  $\text{ZnIn}_2\text{S}_4$  and D-Y-TiO<sub>2</sub> corresponding to the UV-vis spectra in Figure 4b.

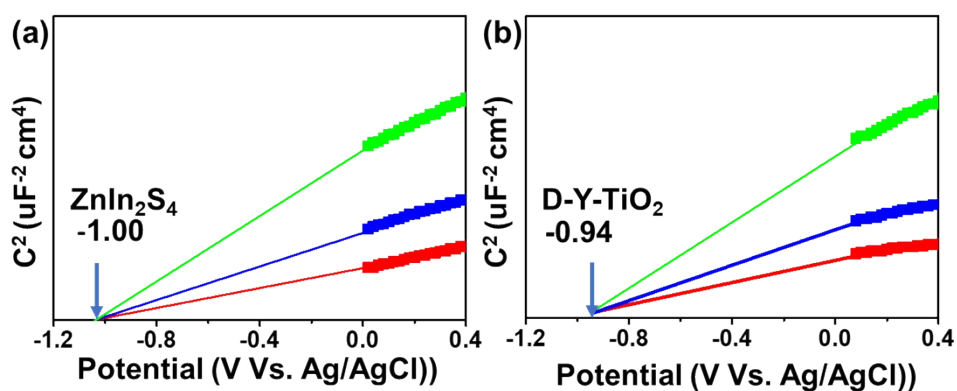

**Figure S16.** Mott-Schottky plots of  $\text{ZnIn}_2\text{S}_4$  and D-Y-TiO<sub>2</sub>.

**Table S1.** The detailed parameters for PL decay lifetime.

| $T_{\text{total}} = t_1 * R_1 + t_2 * R_2$<br>(ns)                 | $t_1$<br>(ns) | $t_2$<br>(ns) | R 1<br>(%) | R 2<br>(%) |
|--------------------------------------------------------------------|---------------|---------------|------------|------------|
| D-Y-TiO <sub>2</sub> @ZnIn <sub>2</sub> S <sub>4</sub> -3<br>(7.9) | 0.57          | 2.15          | 85.98      | 14.02      |
| ZnIn <sub>2</sub> S <sub>4</sub><br>(2.0)                          | 0.04          | 1.99          | 91.98      | 8.02       |

## Reference

1. N. Wang, Q.M. Sun, R.S. Bai, X. Li, G.Q. Guo, J.H. Yu, In Situ Confinement of Ultrasmall Pd Clusters within Nanosized Silicalite-1 Zeolite for Highly Efficient Catalysis of Hydrogen Generation, *J Am Chem Soc*, 138 (2016) 7484-7487.
